# Supplementary material for: Insect pollination: an ecological process involved in the assembly of the seed microbiota
Source: PubMed Central journal article supplement (PMC7046713; doi:10.1038/s41598-020-60591-5), 2020-02-27

## Supplementary Information

### ***Insect pollination: an ecological process involved in the assembly of the seed microbiota***

Alberto Prado<sup>1\*</sup>, Brice Marolleau<sup>2</sup>, Bernard Vaissière<sup>3</sup>, Matthieu Barret<sup>2</sup>, Gloria Torres-Cortes<sup>2\*</sup> 

\*These authors contributed equally to the work

Correspondence to [gloriatorresco@gmail.com](mailto:gloriatorresco@gmail.com)

<sup>1</sup>Escuela Nacional de Estudios Superiores, Unidad Juriquilla, UNAM, Querétaro, México

<sup>2</sup>INRA, UR 406 Abeilles et Environnement, F 84914, Avignon, France

<sup>3</sup>IRHS, Agrocampus-Ouest, INRA, Université d'Angers, SFR4207 QuaSaV, 49071, Beaucouzé, France

## Supplementary Figures

**Supplementary Figure S1. Rarefaction curve.** Representation of the observed number of ASVs as a function of the sample size.

**Supplementary Figure S2. Heat trees showing the taxonomic composition of different material collected in 2017 (left part of the panel) and 2018 (right part of the panel).** Microbial composition of honey bees (a,b), pollen (c,d) and nectar (e,f) is shown in color (grey branches represent absent taxa). Size of nodes refer to the number of ASVs of known identity and the color of nodes and edges represent the ASV read abundance

**Supplementary Figure S1. Rarefaction curve.** Representation of the observed number of ASVs as a function of the sample size

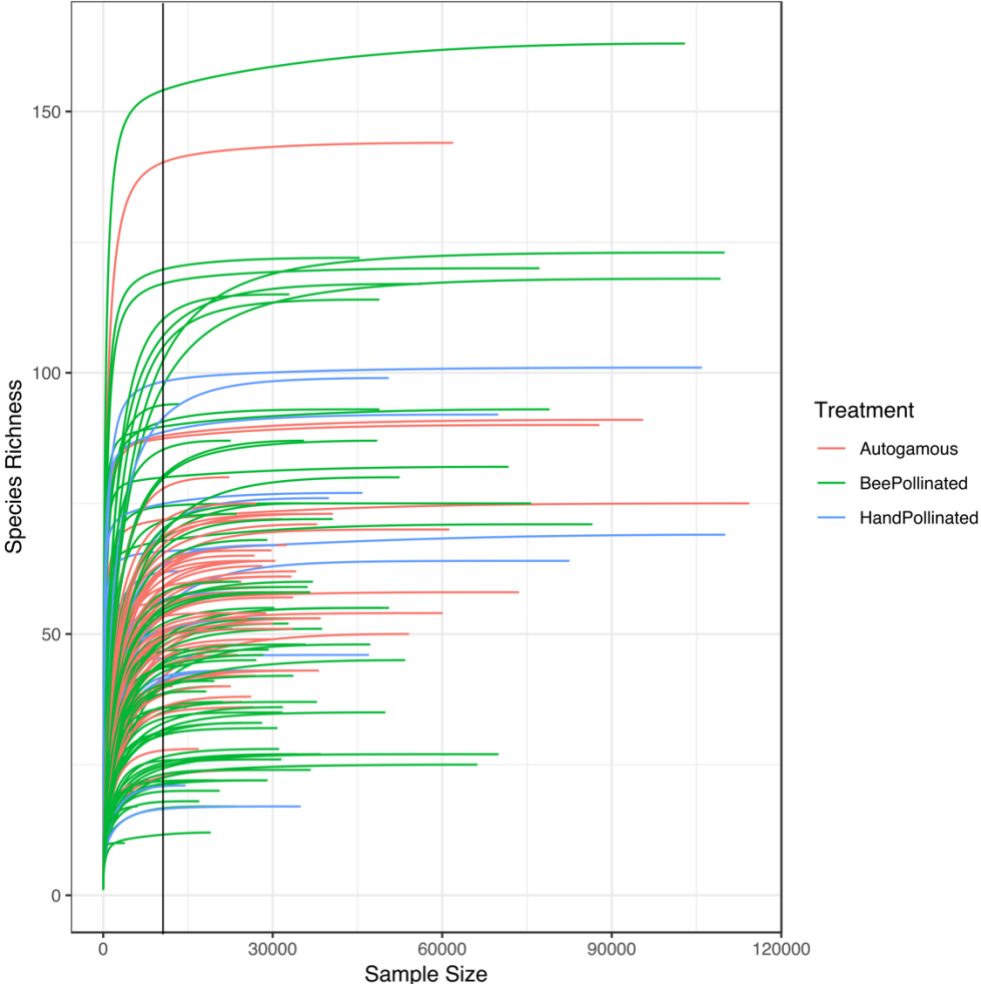

**Supplementary Figure S2. Heat trees showing the taxonomic composition of different material collected in 2017 (left part of the panel) and 2018 (right part of the panel). Microbial composition of bees (a,b), pollen (c,d) and nectar (e,f) is shown in color (grey branches represent absent taxa). Size of nodes refer to the number of ASVs of known identity and the color of nodes and edges represent the ASV read abundance**

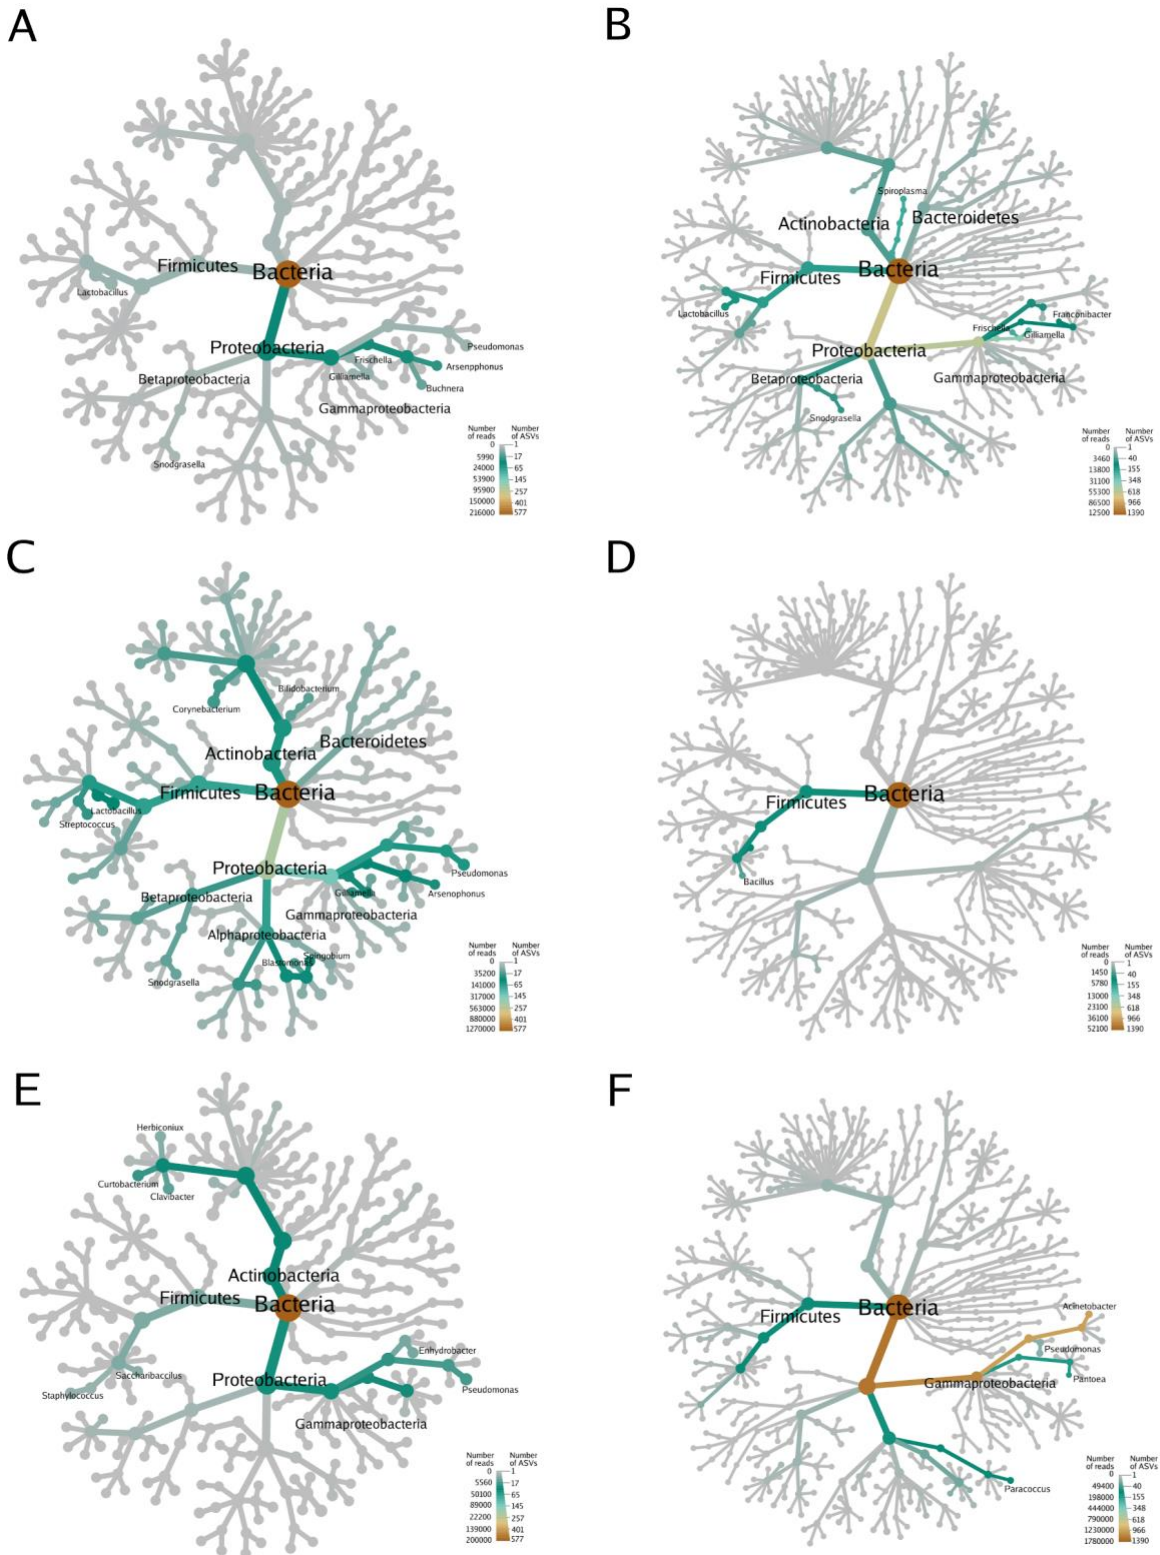

Supplement: 41598_2020_60591_MOESM1_ESM.pdf [file 41598_2020_60591_MOESM1_ESM.pdf]
